# Supplementary material for: On the use of Carbograph 5TD as an adsorbent for sampling VVOCs: validation of an analytical method
Source: Royal Society of Chemistry journal article supplement (doi:10.1039/d3ay00677h), 2023-01-01
Supplement: d3ay00677h1.pdf [file d3ay00677h1.pdf]

## On the use of Carbograph 5TD as adsorbent for sampling VVOCs: Validation of an analytical method

Morgane Even, Elevtheria Juritsch, Matthias Richter\*

Bundesanstalt für Materialforschung und -prüfung (BAM), Unter den Eichen 87, 12205 Berlin, Germany

\*Corresponding author: [matthias.richter@bam.de](mailto:matthias.richter@bam.de)

### SUPPLEMENTARY MATERIAL

#### Figures

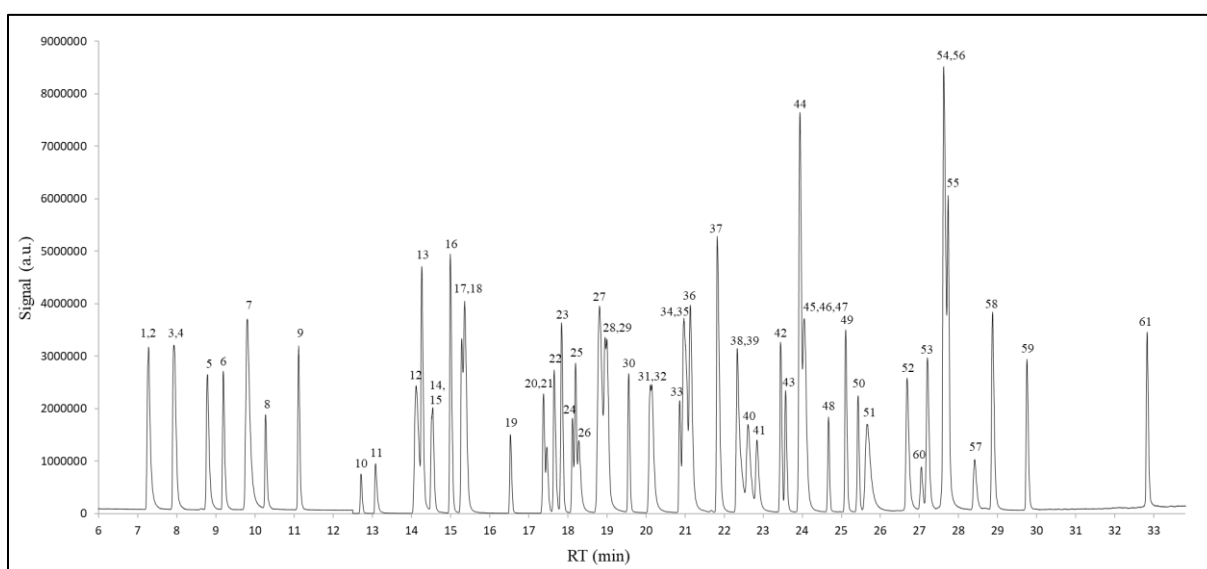

**Figure S1:** Chromatogram of the direct injection of the 61 analytes into the split/splitless injector, analyte numbers are shown in Table S3

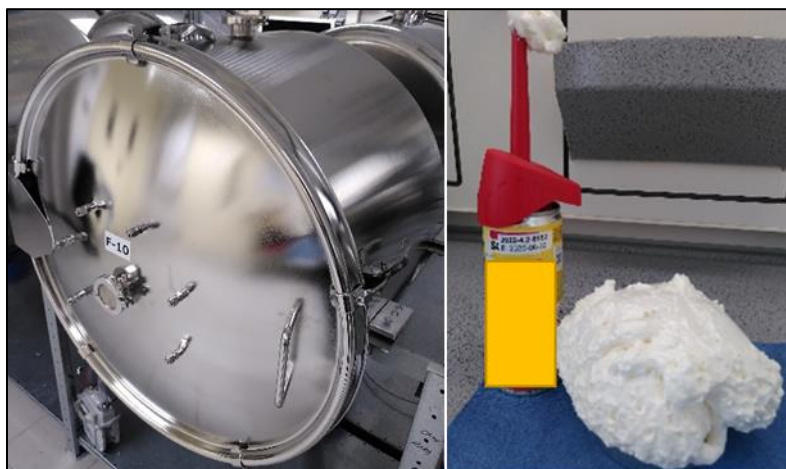

**Figure S2:** Emission test chamber and commercial polyurethane foam sealant considered in the emission test

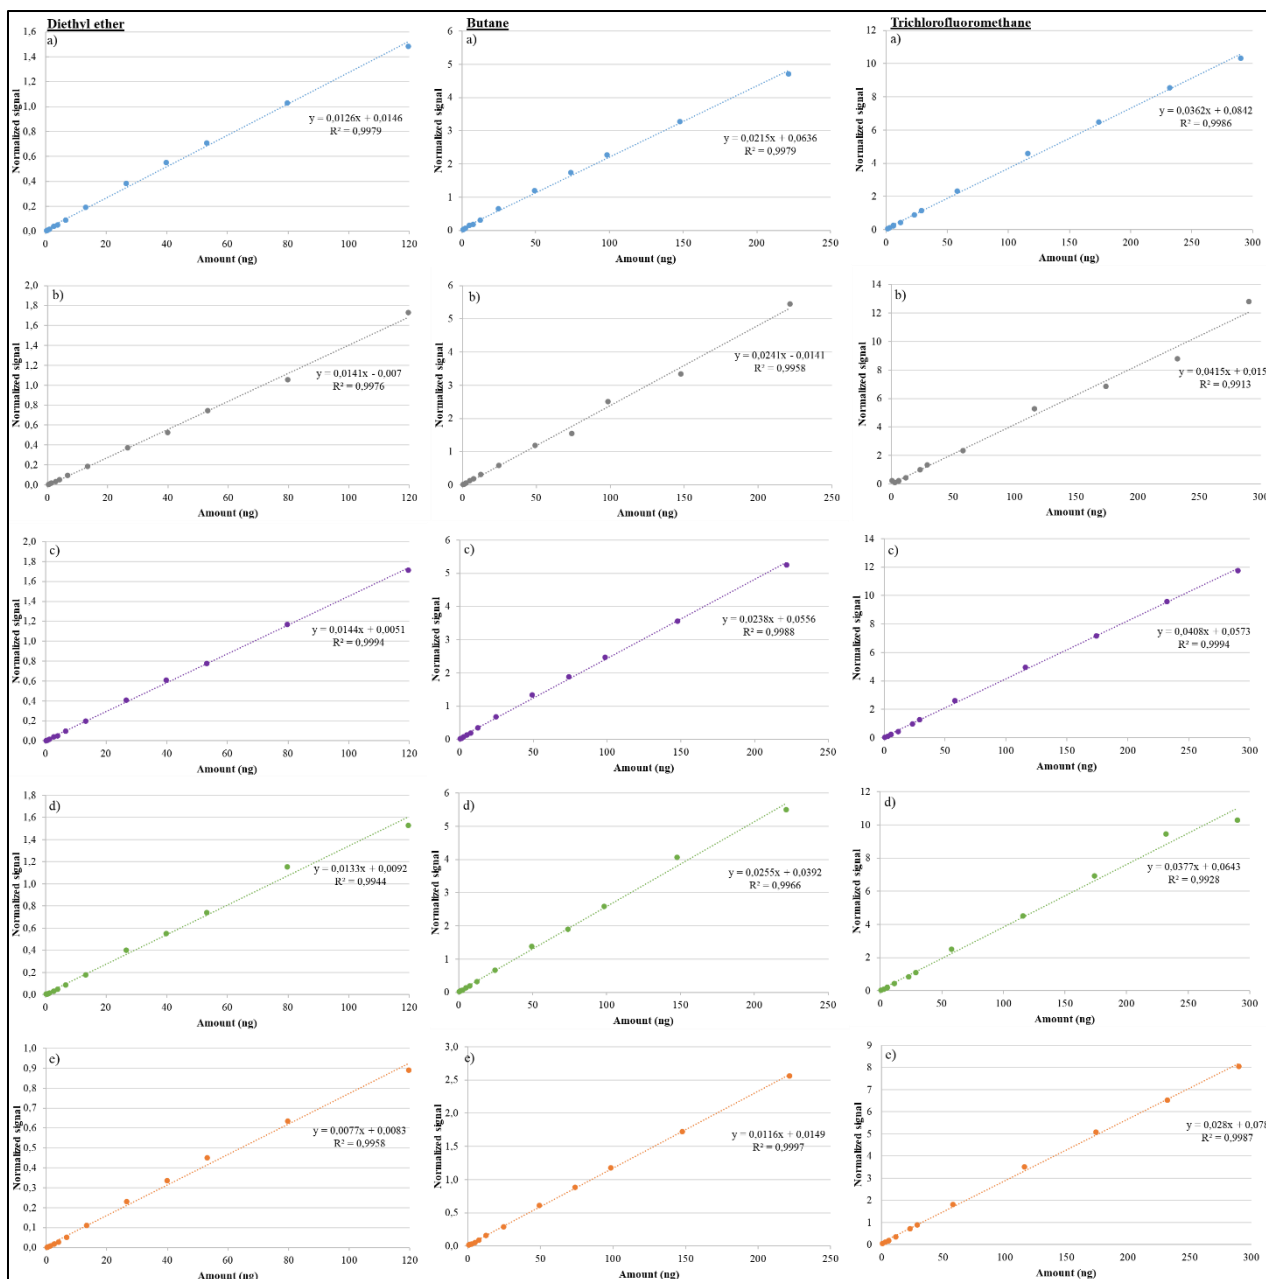

**Figure S3:** Example of calibration curves for each gas mixture: a) Direct injection of the gas standard on the GC column (n=min 3), b) Spiking of the tube in dry nitrogen (n=min 4), c) Spiking of the tube in humidified air (n=3), d) Spiking of the tube in humidified air over 9 min with a syringe pump (n= min 3), e) Short spiking of the tube in dry nitrogen followed by a flushing with humidified air (n=3). The sample volume in all cases was 0.8 L.

Note: The normalized signals are not comparable as the measurements were carried out at different state of the mass spectrometer (especially e)).

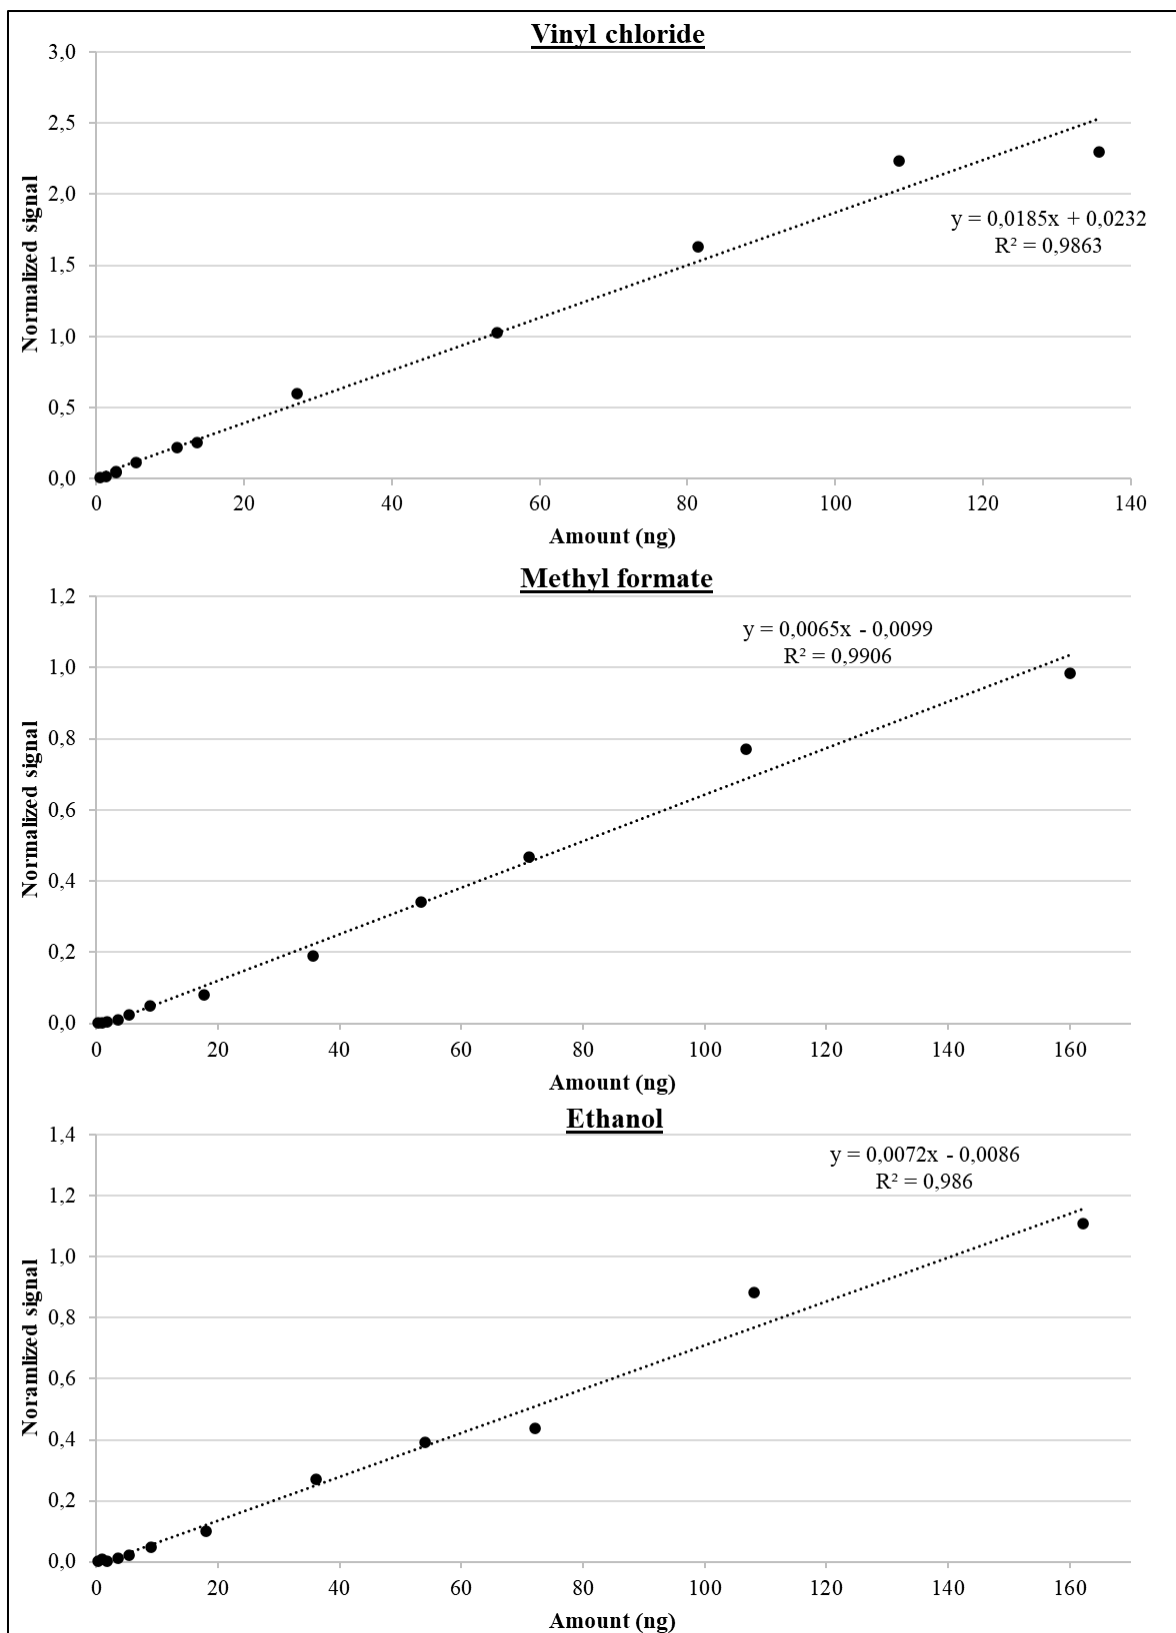

**Figure S4:** Calibration curves of vinyl chloride, ethanol and methyl formate: Spiking of the tube in humidified air over 9 min with a syringe pump (n= min 3)

## Tables

**Table S1:** Analytes with existing guideline values; Bp: boiling point; P<sub>vap</sub>: vapour pressure at 25°C; RI: Kovats retention index on a nonpolar column applying a temperature programme or a ramp [1]; RI: Experimental Kovats retention index on a PoraBOND Q column used in this study; LogK<sub>ow</sub>: logarithm of the octanol-water partition coefficient [2]; logK<sub>oa</sub>: logarithm of the octanol-air partition coefficient; EU-LCI: European lowest concentration of interest [3]; NIK: German lowest concentration of interest (Niedrigste interessierende Konzentration) [4]; -: on the working or waiting list [5]; AIR: German committee for indoor air guideline values [6]; CMR: carcinogenic mutagenic or reprotoxic, according to CLP (EC 1272/2008) [7].

[1] <https://webbook.nist.gov/chemistry/name-ser/>

[2] <https://www.dguv.de/ifa/gestis/gestis-stoffdatenbank/index-2.jsp>

[3] [https://single-market-economy.ec.europa.eu/sectors/construction/eu-lci-subgroup/eu-lci-values\\_en](https://single-market-economy.ec.europa.eu/sectors/construction/eu-lci-subgroup/eu-lci-values_en)

[4] [https://www.umweltbundesamt.de/sites/default/files/medien/4031/dokumente/agbb\\_evaluation\\_scheme\\_2021.pdf](https://www.umweltbundesamt.de/sites/default/files/medien/4031/dokumente/agbb_evaluation_scheme_2021.pdf)

[5] [https://www.umweltbundesamt.de/sites/default/files/medien/4031/dokumente/prospective\\_lci\\_value\\_changes\\_november\\_2022.pdf](https://www.umweltbundesamt.de/sites/default/files/medien/4031/dokumente/prospective_lci_value_changes_november_2022.pdf)

[6] <https://www.umweltbundesamt.de/en/gallery/guide-values-for-the-concentration-of-specific>

[7] <https://eur-lex.europa.eu/legal-content/en/TXT/?uri=CELEX%3A32008R1272>

|                | CAS            | Substance                | Bp<br>(°C) | Kovats RI          |               | Log<br>K <sub>ow</sub> | Log<br>K <sub>oa</sub> | Guideline value (µg m <sup>-3</sup> ) |          |                   | CMR<br>classification |
|----------------|----------------|--------------------------|------------|--------------------|---------------|------------------------|------------------------|---------------------------------------|----------|-------------------|-----------------------|
|                |                |                          |            | nonpolar<br>column | PoraBOND<br>Q |                        |                        | EU-LCI                                | NIK      | AIR               |                       |
| C <sub>1</sub> | 75-45-6        | Chlorodifluorome thane   | -40.7      | 305                | 275           | 1,08                   | /                      |                                       |          |                   |                       |
|                | 74-87-3        | Chloromethane            | -24.0      | 332                | 287           | 0,91                   | 1,39                   |                                       |          |                   | Carc 2                |
|                | 67-66-3        | Chloroform               | 61.1       | 620                | 535           | 1,97                   | 2,80                   |                                       |          |                   | Carc 2, Repr 2        |
|                | 75-71-8        | Dichlorodifluorome thane | 8.9        | 314                | 322           | 2,16                   | /                      |                                       |          |                   |                       |
|                | 75-09-2        | Dichlorome thane         | 40.0       | 531                | 441           | 1,25                   | 2,27                   |                                       |          | 200/2000          | Carc 2,               |
|                | 75-15-0        | Carbon disulfide         | 46.0       | 517                | 447           | 1,94                   | 2,28                   |                                       |          |                   | Repr 2                |
|                | 67-56-1        | Methanol                 | 64.6       | 354                | 273           | -0,77                  | 2,88                   |                                       |          | 13000/40000 (1 h) |                       |
|                | 56-23-5        | Tetrachlorome thane      | 76.8       | 664                | 600           | 2,83                   | 2,79                   |                                       |          |                   | Carc 2                |
|                | 75-69-4        | Trichlorofluorome thane  | 23.7       | 486                | 458           | 2,53                   | /                      |                                       |          |                   |                       |
| C <sub>2</sub> | 75-35-4        | 1,1-Dichlore thane       | 31.6       | 522                | 459           | 2,13                   | /                      |                                       |          |                   | Carc 2                |
|                | 107-06-2       | 1,2-Dichlore thane       | 83.5       | 673                | 561           | 1,48                   | 2,78                   |                                       |          |                   | Carc 1B               |
|                | 75-07-0        | Acetalde hyde            | 20.1       | 381                | 329           | -0,34                  | /                      | 300                                   | 300      | 100/1000          | Carc 1B, Mut 2        |
|                | 75-05-8        | Acetonitrile             | 81.7       | 452                | 389           | -0,34                  | 2,31                   |                                       |          |                   |                       |
|                | 74-96-4        | Bromoe thane             | 38.5       | 511                | 460           | 1,61                   | 2,11                   |                                       |          |                   | Carc 2                |
|                | 75-00-3        | Chloroe thane            | 12.3       | 430                | 390           | 1,43                   | /                      |                                       |          |                   | Carc 2                |
|                | 115-10-6       | Dime thyle ther          | -24.8      | 327                | 310           | 0,10                   | 1,37                   |                                       |          |                   |                       |
|                | 64-17-5        | Ethanol                  | 78.3       | 459                | 370           | -0,31                  | 3,25                   |                                       | -        |                   |                       |
|                | 107-31-3       | Methyl formate           | 31.7       | 401,1              | 366           | 0,03                   | 1,75                   | 3000                                  |          |                   |                       |
|                | 79-01-6        | Trichloroe thane         | 87.2       | 702,1              | 601           | 2,42                   | 2,99                   |                                       |          |                   | Carc 1B, Mut 2        |
|                | 75-01-4        | Vinyl chloride           | -13.3      | 353                | 343           | 1,46                   | /                      |                                       |          |                   | Carc 1A               |
| C <sub>3</sub> | 71-23-8        | 1-Propanol               | 97.2       | 568                | 473           | 0,25                   | 3,71                   |                                       | -        |                   |                       |
|                | 75-29-6        | 2-Chloropropane          | 35.0       | 196                | 473           | 1,90                   | /                      |                                       |          | 800/8000          |                       |
|                | 67-64-1        | Acetone                  | 56.1       | 500                | 439           | -0,24                  | 2,31                   | 120000                                | 120000   | 53000/160000      |                       |
|                | 107-02-8       | Acrolein                 | 52.6       | 480                | 419           | -0,01                  | /                      |                                       | 14       |                   |                       |
|                | 107-13-1       | Acrylonitrile            | 77.3       | 526                | 445           | 0,25                   | /                      |                                       |          |                   | Carc 1B               |
|                | 75-19-4        | Cyclopropane             | -32.8      | 331                | 303           | 1,72                   | /                      |                                       |          |                   |                       |
|                | 67-63-0        | Isopropanol              | 82.3       | 506                | 448           | 0,05                   | 3,41                   |                                       | -        |                   |                       |
|                | 79-20-9        | Methyl acetate           | 56.8       | 515                | 464           | 0,18                   | 2,31                   |                                       | -        |                   |                       |
|                | 96-33-3        | Methyl acrylate          | 80.2       | 625                | 547           | 0,80                   | /                      | 180                                   | 180      |                   |                       |
|                | 123-38-6       | Propanal                 | 48.0       | 511                | 436           | 0,59                   | 3,02                   | 650                                   | 650      |                   |                       |
|                | 107-12-0       | Propane nitrile          | 97.1       | 544                | 487           | 0,16                   | 2,69                   |                                       |          |                   |                       |
| 115-07-1       | Propene        | -47.7                    | 290        | 288                | 1,77          | /                      |                        |                                       |          |                   |                       |
| C <sub>4</sub> | 106-99-0       | 1,3-Butadiene            | -4.5       | 394                | 387           | 1,99                   | /                      |                                       |          |                   | Carc 1A, Mut 1B       |
|                | 123-91-1       | 1,4-Dioxan               | 101.5      | 705                | 614           | -0,27                  | 3,18                   | 400                                   | 400      |                   | Carc 2                |
|                | 78-93-3        | 2-Butanone               | 79.5       | 592                | 537           | 0,29                   | 2,71                   | 20000                                 | 20000    |                   |                       |
|                | 590-18-1       | cis-2-Butene             | 0.9        | 422                | 396           | 2,33                   | /                      |                                       |          |                   |                       |
|                | 60-29-7        | Diethyle ther            | 35.0       | 485                | 484           | 0,89                   | 2,19                   |                                       |          |                   |                       |
|                | 141-78-6       | Ethyl acetate            | 77.1       | 628                | 555           | 0,73                   | 2,70                   |                                       | -        | 600/6000          |                       |
|                | 110-00-9       | Furan                    | 31.5       | 492                | 434           | 1,34                   | /                      |                                       |          |                   | Carc 1B, Mut 2        |
|                | 75-28-5        | Isobutane                | -11.7      | 359                | 386           | 2,76                   | /                      |                                       |          |                   | Carc 1A, Mut 1B       |
|                | 78-84-2        | Isobutanal               | 64.5       | 548                | 517           | 1,20                   | /                      |                                       |          |                   |                       |
|                | 78-85-3        | Methacrolein             | 68.4       | 577                | 508           | /                      | /                      |                                       |          |                   |                       |
|                | 126-98-7       | Methacrylonitrile        | 90.3       | 575                | 528           | 0,68                   | /                      |                                       |          |                   |                       |
|                | 106-97-8       | n-Butane                 | 0.5        | 400                | 399           | 2,89                   | 1,53                   |                                       |          |                   | Carc 1A, Mut 1B       |
|                | 123-72-8       | Butanal                  | 74.8       | 601                | 536           | 0,88                   | 3,39                   | 650                                   | 650      | 100/2000          |                       |
|                | 75-65-0        | tert. Butanol            | 82.4       | 507,3              | 509           | 0,35                   | 3,50                   | 620                                   | 620      |                   |                       |
|                | 109-99-9       | Tetrahydrofuran          | 65.0       | 624                | 538           | 0,46                   | 2,86                   | 500                                   | 500      |                   | Carc 2                |
| 624-64-6       | trans-2-Butene | 0.9                      | 410        | 400                | 2,33          | /                      |                        |                                       |          |                   |                       |
| 108-05-4       | Vinyl acetate  | 71.6                     | 562        | 527                | 0,73          | /                      |                        | -                                     |          | Carc 2            |                       |
| C <sub>5</sub> | 287-92-3       | Cyclopentane             | 49.3       | 554,5              | 514           | 3,00                   | /                      |                                       |          |                   |                       |
|                | 78-78-4        | Isopentane               | 27.8       | 474                | 486           | 2,72                   | /                      |                                       |          |                   |                       |
|                | 78-79-5        | Isoprene                 | 34.0       | 504                | 489           | 2,42                   | 2,06                   |                                       |          |                   | Carc 1B, Mut 2        |
|                | 108-21-4       | Isopropyl acetate        | 88.6       | 662                | 622           | 1,02                   | 2,93                   | 4200                                  | 4200     |                   |                       |
|                | 1634-04-4      | Methyl tert-butyl ether  | 55.2       | 554,5              | 565           | 0,94                   | 2,58                   |                                       |          |                   |                       |
|                | 109-66-0       | n-Pentane                | 36.1       | 500                | 500           | 3,39                   | 1,96                   |                                       |          |                   |                       |
| 110-62-3       | Pentanal       | 103.1                    | 699        | 639                | 1,31          | /                      | 800                    | 800                                   | 100/2000 |                   |                       |
| C <sub>6</sub> | 107-83-5       | 2-Methylpentane          | 60.2       | 558                | 584           | 3,20                   | /                      |                                       |          |                   |                       |
|                | 96-14-0        | 3-Methylpentane          | 63.2       | 577                | 590           | 3,60                   | /                      |                                       | -        |                   |                       |
|                | 71-43-2        | Benzene                  | 80.0       | 666                | 592           | 2,13                   | 2,78                   |                                       |          |                   | Carc 1A, Mut 1B       |
|                | 110-54-3       | n-Hexane                 | 69.0       | 600                | 600           | 3,90                   | 2,40                   | 4300                                  | 4300     |                   | Repr 2                |

**Table S2:** Calibration levels considered in this study (volume of the gas mixture in  $\mu\text{L}$  and amount of the substance in ng)

| Compound                                 | Calibration range (ng) |            |            |            |            |            |           |           |           |           |           |           |
|------------------------------------------|------------------------|------------|------------|------------|------------|------------|-----------|-----------|-----------|-----------|-----------|-----------|
|                                          | Cal1                   | Cal2       | Cal3       | Cal4       | Cal5       | Cal6       | Cal7      | Cal8      | Cal9      | Cal10     | Cal11     | Cal12     |
| <b>Self-made gas mixture</b>             |                        |            |            |            |            |            |           |           |           |           |           |           |
| <b>Volume (<math>\mu\text{L}</math>)</b> | <b>0,2</b>             | <b>0,5</b> | <b>1,0</b> | <b>2,0</b> | <b>3,0</b> | <b>5,0</b> | <b>10</b> | <b>20</b> | <b>30</b> | <b>40</b> | <b>60</b> | <b>90</b> |
| Methanol                                 | 0,4                    | 0,9        | 1,8        | 3,6        | 5,3        | 8,9        | 17,8      | 35,5      | 53,3      | 71,0      | 106,5     | 159,8     |
| Methyl formate                           | 0,4                    | 0,9        | 1,8        | 3,6        | 5,3        | 8,9        | 17,8      | 35,6      | 53,4      | 71,2      | 106,7     | 160,1     |
| Ethanol                                  | 0,4                    | 0,9        | 1,8        | 3,6        | 5,4        | 9,0        | 18,0      | 36,0      | 54,1      | 72,1      | 108,1     | 162,2     |
| Acetonitrile                             | 0,2                    | 0,4        | 0,9        | 1,7        | 2,6        | 4,4        | 8,7       | 17,5      | 26,2      | 35,0      | 52,4      | 78,7      |
| Furan                                    | 0,2                    | 0,5        | 1,1        | 2,1        | 3,2        | 5,3        | 10,6      | 21,2      | 31,8      | 42,4      | 63,5      | 95,3      |
| Propanal                                 | 0,4                    | 1,0        | 2,1        | 4,2        | 6,3        | 10,5       | 20,9      | 41,9      | 62,8      | 83,7      | 125,6     | 188,4     |
| Acetone                                  | 0,3                    | 0,7        | 1,4        | 2,9        | 4,3        | 7,1        | 14,3      | 28,6      | 42,9      | 57,2      | 85,8      | 128,7     |
| Dichloromethane                          | 0,3                    | 0,7        | 1,3        | 2,6        | 3,9        | 6,6        | 13,1      | 26,3      | 39,4      | 52,6      | 78,9      | 118,3     |
| Acrylonitrile                            | 0,2                    | 0,4        | 0,9        | 1,8        | 2,6        | 4,4        | 8,8       | 17,5      | 26,3      | 35,0      | 52,5      | 78,8      |
| Carbon disulfide                         | 0,2                    | 0,5        | 1,0        | 1,9        | 2,9        | 4,8        | 9,6       | 19,3      | 28,9      | 38,5      | 57,8      | 86,7      |
| Isopropanol                              | 0,2                    | 0,5        | 1,1        | 2,1        | 3,2        | 5,3        | 10,7      | 21,3      | 32,0      | 42,7      | 64,0      | 96,1      |
| 1,1-Dichloroethene                       | 0,1                    | 0,4        | 0,7        | 1,5        | 2,2        | 3,7        | 7,3       | 14,7      | 22,0      | 29,3      | 44,0      | 66,0      |
| Bromoethane                              | 0,3                    | 0,7        | 1,4        | 2,9        | 4,3        | 7,2        | 14,4      | 28,8      | 43,2      | 57,5      | 86,3      | 129,5     |
| Methyl acetate                           | 0,4                    | 1,0        | 2,1        | 4,1        | 6,2        | 10,3       | 20,5      | 41,1      | 61,6      | 82,1      | 123,2     | 184,7     |
| 1-Propanol                               | 0,4                    | 0,9        | 1,8        | 3,6        | 5,4        | 9,0        | 18,0      | 36,0      | 53,9      | 71,9      | 107,9     | 161,8     |
| Diethyl ether                            | 0,3                    | 0,7        | 1,3        | 2,7        | 4,0        | 6,6        | 13,3      | 26,6      | 39,9      | 53,2      | 79,7      | 119,6     |
| Propanenitrile                           | 0,2                    | 0,4        | 0,9        | 1,7        | 2,6        | 4,3        | 8,5       | 17,0      | 25,5      | 34,1      | 51,1      | 76,6      |
| Isoprene                                 | 0,2                    | 0,6        | 1,2        | 2,5        | 3,7        | 6,2        | 12,4      | 24,9      | 37,3      | 49,7      | 74,6      | 111,9     |
| tert-Butanol                             | 0,2                    | 0,6        | 1,1        | 2,2        | 3,3        | 5,6        | 11,1      | 22,2      | 33,3      | 44,4      | 66,6      | 99,9      |
| Methacrolein                             | 0,3                    | 0,7        | 1,3        | 2,7        | 4,0        | 6,6        | 13,3      | 26,6      | 39,9      | 53,1      | 79,7      | 119,6     |
| Cyclopentane                             | 0,2                    | 0,5        | 0,9        | 1,8        | 2,7        | 4,6        | 9,1       | 18,3      | 27,4      | 36,5      | 54,8      | 82,2      |
| Isobutanol                               | 0,2                    | 0,5        | 1,1        | 2,2        | 3,2        | 5,4        | 10,8      | 21,6      | 32,3      | 43,1      | 64,7      | 97,0      |
| Vinyl acetate                            | 0,4                    | 0,9        | 1,8        | 3,7        | 5,5        | 9,2        | 18,3      | 36,6      | 54,9      | 73,3      | 109,9     | 164,8     |
| Methacrylonitrile                        | 0,2                    | 0,4        | 0,9        | 1,8        | 2,6        | 4,4        | 8,8       | 17,7      | 26,5      | 35,3      | 53,0      | 79,5      |
| Butanol                                  | 0,3                    | 0,7        | 1,3        | 2,6        | 3,9        | 6,6        | 13,1      | 26,2      | 39,4      | 52,5      | 78,7      | 118,1     |
| Tetrahydrofuran                          | 0,2                    | 0,5        | 1,1        | 2,1        | 3,2        | 5,3        | 10,6      | 21,1      | 31,7      | 42,3      | 63,4      | 95,1      |
| 2-Butanone                               | 0,2                    | 0,6        | 1,2        | 2,4        | 3,7        | 6,1        | 12,2      | 24,4      | 36,6      | 48,8      | 73,2      | 109,8     |
| Methyl acrylate                          | 0,2                    | 0,5        | 1,0        | 2,0        | 3,1        | 5,1        | 10,2      | 20,4      | 30,6      | 40,7      | 61,1      | 91,7      |
| Ethyl acetate                            | 0,3                    | 0,8        | 1,6        | 3,3        | 4,9        | 8,2        | 16,5      | 32,9      | 49,4      | 65,8      | 98,7      | 148,1     |
| 1,2-Dichloroethane                       | 0,2                    | 0,4        | 0,9        | 1,7        | 2,6        | 4,3        | 8,6       | 17,2      | 25,8      | 34,4      | 51,6      | 77,3      |
| Methyl tert-butyl ether                  | 0,2                    | 0,5        | 1,1        | 2,2        | 3,3        | 5,5        | 11,0      | 21,9      | 32,9      | 43,9      | 65,8      | 98,7      |
| 2-Methylpentane                          | 0,2                    | 0,4        | 0,9        | 1,8        | 2,7        | 4,5        | 8,9       | 17,8      | 26,7      | 35,6      | 53,5      | 80,2      |
| Benzene                                  | 0,2                    | 0,4        | 0,8        | 1,6        | 2,4        | 4,0        | 8,0       | 16,1      | 24,1      | 32,1      | 48,2      | 72,3      |
| Tetrachloromethane                       | 0,2                    | 0,4        | 0,8        | 1,7        | 2,5        | 4,2        | 8,4       | 16,8      | 25,2      | 33,7      | 50,5      | 75,7      |
| Trichloroethene                          | 0,2                    | 0,4        | 0,9        | 1,8        | 2,7        | 4,5        | 8,9       | 17,8      | 26,7      | 35,6      | 53,4      | 80,2      |
| 1,4-Dioxan                               | 0,2                    | 0,5        | 1,0        | 2,1        | 3,1        | 5,1        | 10,3      | 20,6      | 30,9      | 41,2      | 61,8      | 92,6      |
| Isopropyl acetate                        | 0,3                    | 0,8        | 1,6        | 3,1        | 4,7        | 7,8        | 15,6      | 31,2      | 46,9      | 62,5      | 93,7      | 140,6     |
| Pentanal                                 | 0,2                    | 0,6        | 1,2        | 2,5        | 3,7        | 6,2        | 12,4      | 24,8      | 37,3      | 49,7      | 74,5      | 111,8     |
| n-Heptane                                | 0,2                    | 0,4        | 0,8        | 1,7        | 4,9        | 4,1        | 8,3       | 16,6      | 24,9      | 33,2      | 49,8      | 74,6      |
| <b>Commercial gas mixture 1</b>          |                        |            |            |            |            |            |           |           |           |           |           |           |
| <b>Volume (<math>\mu\text{L}</math>)</b> | <b>0,2</b>             | <b>0,5</b> | <b>1,0</b> | <b>2,0</b> | <b>3,0</b> | <b>5,0</b> | <b>10</b> | <b>20</b> | <b>30</b> | <b>40</b> | <b>60</b> | <b>90</b> |
| Propene                                  | 0,3                    | 0,9        | 1,7        | 3,4        | 5,1        | 8,5        | 17,0      | 34,1      | 51,1      | 68,2      | 102,2     | 153,3     |
| Cyclopropane                             | 0,3                    | 0,9        | 1,8        | 3,5        | 5,3        | 8,8        | 17,7      | 35,4      | 53,1      | 70,7      | 106,1     | 159,2     |
| Dimethyl ether                           | 0,3                    | 1,0        | 1,9        | 3,8        | 5,7        | 9,5        | 19,1      | 38,2      | 57,3      | 76,4      | 114,6     | 171,9     |
| Acetaldehyde                             | 0,4                    | 1,0        | 1,9        | 3,9        | 5,8        | 9,7        | 19,5      | 39,0      | 58,5      | 77,9      | 116,9     | 175,4     |
| Isobutane                                | 0,5                    | 1,2        | 2,4        | 4,8        | 7,3        | 12,1       | 24,2      | 48,4      | 72,6      | 96,7      | 145,1     | 217,7     |
| 1,3-Butadiene                            | 0,4                    | 1,1        | 2,2        | 4,4        | 6,5        | 10,9       | 21,8      | 43,6      | 65,4      | 87,2      | 130,7     | 196,1     |
| cis/trans-2-Butene*                      | 0,5                    | 1,2        | 2,4        | 4,7        | 7,1        | 11,9       | 23,7      | 47,4      | 71,2      | 94,9      | 142,3     | 213,5     |
| n-Butane                                 | 0,5                    | 1,2        | 2,5        | 4,9        | 7,4        | 12,3       | 24,6      | 49,2      | 73,9      | 98,5      | 147,7     | 221,6     |
| cis/trans-2-Butene*                      | 0,5                    | 1,2        | 2,4        | 4,9        | 7,3        | 12,2       | 24,3      | 48,6      | 72,9      | 97,2      | 145,8     | 218,7     |
| Acrolein                                 | 0,5                    | 1,2        | 2,4        | 4,7        | 7,1        | 11,8       | 23,6      | 47,2      | 70,8      | 94,4      | 141,7     | 212,5     |
| Isopentane                               | 0,6                    | 1,5        | 3,0        | 6,0        | 9,0        | 15,0       | 29,9      | 59,8      | 89,7      | 119,6     | 179,4     | 269,1     |
| n-Pentane                                | 0,6                    | 1,5        | 3,0        | 6,0        | 8,9        | 14,9       | 29,8      | 59,5      | 89,3      | 119,0     | 178,5     | 267,8     |
| n-Hexane                                 | 0,7                    | 1,8        | 3,5        | 7,1        | 10,6       | 17,6       | 35,3      | 70,5      | 105,8     | 141,0     | 211,5     | 317,3     |
| <b>Commercial gas mixture 2</b>          |                        |            |            |            |            |            |           |           |           |           |           |           |
| <b>Volume (<math>\mu\text{L}</math>)</b> | <b>0,2</b>             | <b>0,5</b> | <b>1,0</b> | <b>1,0</b> | <b>2,0</b> | <b>4,0</b> | <b>5</b>  | <b>10</b> | <b>20</b> | <b>30</b> | <b>40</b> | <b>50</b> |
| Chlorodifluoromethane                    | 0,8                    | 1,9        | 3,8        | 3,8        | 7,6        | 15,2       | 19,0      | 38,0      | 75,9      | 113,9     | 151,8     | 189,8     |
| Chloromethane                            | 0,4                    | 1,0        | 2,0        | 2,0        | 4,0        | 7,9        | 9,9       | 19,8      | 39,6      | 59,4      | 79,3      | 99,1      |
| Dichlorodifluoromethane                  | 1,0                    | 2,4        | 4,8        | 4,8        | 9,6        | 19,1       | 23,9      | 47,8      | 95,5      | 143,3     | 191,0     | 238,8     |
| Vinyl chloride                           | 0,5                    | 1,4        | 2,7        | 2,7        | 5,4        | 10,9       | 13,6      | 27,2      | 54,3      | 81,5      | 108,6     | 135,8     |
| Chloroethane                             | 0,5                    | 1,3        | 2,6        | 2,6        | 5,2        | 10,4       | 13,1      | 26,1      | 52,2      | 78,4      | 104,5     | 130,6     |
| Trichlorofluoromethane                   | 0,5                    | 2,9        | 5,8        | 5,8        | 11,6       | 23,2       | 29,0      | 58,0      | 116,0     | 174,0     | 232,1     | 290,1     |
| 2-Chloropropane                          | 0,7                    | 1,6        | 3,3        | 3,3        | 6,6        | 13,1       | 16,4      | 32,8      | 65,7      | 98,5      | 131,4     | 164,2     |
| Chloroform                               | 1,0                    | 2,5        | 5,0        | 5,0        | 10,0       | 20,0       | 25,0      | 50,0      | 100,0     | 150,1     | 200,1     | 250,1     |

**Table S3:** Analytes with their quantifier ions and retention times

|    |                         | Quantifier ion | RT (min) |
|----|-------------------------|----------------|----------|
| 1  | Chlorodifluoromethane   | 51,0           | 7,37     |
| 2  | Methanol                | 29,0           | 7,32     |
| 3  | Propene                 | 41,0           | 8,10     |
| 4  | Chloromethane           | 50,0           | 8,10     |
| 5  | Cyclopropane            | 42,0           | 9,00     |
| 6  | Dimethyl ether          | 45,0           | 9,39     |
| 7  | Dichlorodifluoromethane | 84,9           | 10,09    |
| 8  | Acetaldehyde            | 44,0           | 10,48    |
| 9  | Vinyl chloride          | 62,0           | 11,39    |
| 10 | Methyl formate          | 60,0           | 12,99    |
| 11 | Ethanol                 | 45,0           | 13,31    |
| 12 | Isobutane               | 43,0           | 14,53    |
| 13 | 1,3-Butadiene           | 54,0           | 14,63    |
| 14 | Acetonitrile            | 41,0           | 14,76    |
| 15 | Chloroethane            | 64,0           | 14,92    |
| 16 | cis/trans-2-butene*     | 56,0           | 15,37    |
| 17 | n-butane                | 43,0           | 15,70    |
| 18 | cis/trans-2-butene*     | 56,0           | 15,75    |
| 19 | Acrolein                | 56,0           | 16,86    |
| 20 | Furan                   | 68,0           | 17,76    |
| 21 | Propanal                | 58,0           | 17,86    |
| 22 | Acetone                 | 43,0           | 18,04    |
| 23 | Dichloromethane         | 83,9           | 18,20    |
| 24 | Acrylonitrile           | 53,0           | 18,44    |
| 25 | Carbon disulfide        | 75,9           | 18,56    |
| 26 | Isopropanol             | 45,0           | 18,64    |
| 27 | Trichlorofluoromethane  | 100,9          | 19,26    |
| 28 | 1,1-Dichloroethene      | 60,9           | 19,36    |
| 29 | Bromoethane             | 107,9          | 19,44    |
| 30 | Methyl acetate          | 74,0           | 19,94    |
| 31 | 2-Chloropropane         | 63,0           | 20,55    |
| 32 | 1-Propanol              | 59,0           | 20,53    |
| 33 | Diethyl ether           | 59,0           | 21,30    |
| 34 | Isopentane              | 57,0           | 21,46    |
| 35 | Propanenitrile          | 54,0           | 21,41    |
| 36 | Isoprene                | 67,0           | 21,59    |
| 37 | n-Pentane               | 43,0           | 22,32    |
| 38 | tert-Butanol            | 59,0           | 22,83    |
| 39 | Methacrolein            | 70,0           | 22,77    |
| 40 | Cyclopentane            | 55,0           | 23,14    |
| 41 | Isobutanal              | 72,0           | 23,29    |
| 42 | Vinyl acetate           | 86,0           | 23,88    |
| 43 | Methacrylonitrile       | 67,0           | 23,99    |
| 44 | Chloroform              | 82,9           | 24,39    |
| 45 | Butanal                 | 44,0           | 24,41    |
| 46 | Tetrahydrofuran         | 71,0           | 24,57    |
| 47 | 2-Butanone              | 57,0           | 24,50    |
| 48 | Methyl acrylate         | 55,0           | 25,10    |
| 49 | Ethyl acetate           | 61,0           | 25,57    |
| 50 | 1,2-Dichloroethane      | 62,0           | 25,89    |
| 51 | Methyl tert-butyl ether | 73,0           | 26,15    |
| 52 | 2-Methylpentane         | 43,0           | 27,23    |
| 53 | Benzene                 | 78,0           | 27,69    |
| 54 | Tetrachloromethane      | 116,8          | 28,16    |
| 55 | Trichloroethene         | 129,8          | 28,21    |
| 56 | n-Hexane                | 57,0           | 28,18    |
| 57 | 1,4-Dioxan              | 88,0           | 28,92    |
| 58 | Isopropyl acetate       | 61,0           | 29,37    |
| 59 | Pentanal                | 44,0           | 30,27    |
| 60 | ISTD Benzene-d6         | 84,0           | 27,53    |
| 61 | n-Heptane               | 71,0           | 33,45    |

**Table S4:** Precision of the method for the different calibration levels, STDEV of three tubes spiked on three different days

| Substance               | Cal1        | Cal2        | Cal3        | Cal4 | Cal5 | Cal6 | Cal7 | Cal8 | Cal9 | Cal10 | Cal11 | Cal12 |
|-------------------------|-------------|-------------|-------------|------|------|------|------|------|------|-------|-------|-------|
| Dichlorodifluoromethane | 4%          | 3%          | 10%         | 6%   | 15%  | 12%  | 44%  | 14%  | 2%   | 6%    | 33%   | 31%   |
| Isobutane               | 4%          | 11%         | 4%          | 12%  | 5%   | 2%   | 2%   | 6%   | 0%   | 5%    | 3%    | 1%    |
| 1,3-Butadiene           | 7%          | 4%          | 4%          | 3%   | 4%   | 4%   | 4%   | 7%   | 1%   | 6%    | 3%    | 2%    |
| Chloroethane            | 6%          | 10%         | 3%          | 4%   | 8%   | 7%   | 7%   | 5%   | 6%   | 6%    | 17%   | 5%    |
| cis/trans-2-Butene*     | 91%         | 27%         | 3%          | 3%   | 4%   | 4%   | 4%   | 6%   | 1%   | 5%    | 3%    | 2%    |
| n-Butane                | 8%          | 10%         | 12%         | 20%  | 4%   | 3%   | 2%   | 6%   | 0%   | 5%    | 3%    | 2%    |
| cis/trans-2-Butene*     | 10%         | 6%          | 2%          | 3%   | 4%   | 4%   | 4%   | 6%   | 1%   | 5%    | 3%    | 2%    |
| Acrolein                | 10%         | 15%         | 12%         | 8%   | 17%  | 2%   | 2%   | 4%   | 1%   | 5%    | 4%    | 1%    |
| Furan                   | 18%         | 19%         | 17%         | 5%   | 14%  | 8%   | 5%   | 8%   | 4%   | 1%    | 1%    | 9%    |
| Propanal                | 9%          | 13%         | 11%         | 11%  | 14%  | 11%  | 9%   | 8%   | 4%   | 3%    | 1%    | 10%   |
| Acetone                 | 0%          | 8%          | 6%          | 7%   | 10%  | 7%   | 6%   | 7%   | 7%   | 1%    | 2%    | 8%    |
| Dichloromethane         | 7%          | 4%          | 1%          | 8%   | 13%  | 9%   | 4%   | 7%   | 5%   | 3%    | 2%    | 7%    |
| Acrylonitrile           | 5%          | 16%         | 12%         | 10%  | 13%  | 12%  | 3%   | 7%   | 6%   | 3%    | 2%    | 9%    |
| Carbon disulfide        | 7%          | 2%          | 2%          | 27%  | 11%  | 9%   | 5%   | 7%   | 4%   | 2%    | 1%    | 8%    |
| Isopropanol             | 11%         | 15%         | 22%         | 11%  | 24%  | 9%   | 5%   | 11%  | 14%  | 2%    | 8%    | 13%   |
| Trichlorofluoromethane  | 2%          | 7%          | 5%          | 14%  | 2%   | 8%   | 2%   | 5%   | 2%   | 2%    | 2%    | 3%    |
| 1,1-Dichloroethene      | 11%         | 5%          | 2%          | 5%   | 11%  | 9%   | 5%   | 6%   | 5%   | 3%    | 1%    | 9%    |
| Bromoethane             | 4%          | 2%          | 9%          | 10%  | 15%  | 9%   | 5%   | 6%   | 5%   | 3%    | 1%    | 9%    |
| Methyl acetate          | 14%         | 3%          | 0%          | 8%   | 15%  | 10%  | 7%   | 7%   | 7%   | 3%    | 2%    | 7%    |
| 2-Chloropropane         | 6%          | 10%         | 9%          | 4%   | 3%   | 9%   | 0%   | 5%   | 3%   | 2%    | 1%    | 4%    |
| 1-Propanol              | <i>n.d.</i> | <i>n.d.</i> | <i>n.d.</i> | 173% | 37%  | 14%  | 9%   | 15%  | 17%  | 4%    | 8%    | 13%   |
| Diethyl ether           | 13%         | 5%          | 3%          | 7%   | 12%  | 9%   | 9%   | 6%   | 6%   | 3%    | 1%    | 7%    |
| Isopentane              | 11%         | 11%         | 5%          | 2%   | 4%   | 3%   | 3%   | 5%   | 1%   | 5%    | 3%    | 2%    |
| Propanenitrile          | 12%         | 25%         | 20%         | 19%  | 19%  | 14%  | 4%   | 9%   | 8%   | 3%    | 3%    | 9%    |
| Isoprene                | 31%         | 7%          | 8%          | 12%  | 23%  | 11%  | 6%   | 6%   | 5%   | 3%    | 1%    | 9%    |
| n-Pentane               | 11%         | 9%          | 2%          | 1%   | 4%   | 5%   | 3%   | 5%   | 1%   | 5%    | 2%    | 2%    |
| tert-Butanol            | 100%        | 87%         | 6%          | 18%  | 22%  | 8%   | 5%   | 10%  | 10%  | 2%    | 5%    | 10%   |
| Methacrolein            | 15%         | 8%          | 6%          | 8%   | 10%  | 9%   | 6%   | 5%   | 6%   | 3%    | 1%    | 5%    |
| Cyclopentane            | 22%         | 10%         | 11%         | 7%   | 8%   | 10%  | 4%   | 9%   | 4%   | 3%    | 1%    | 9%    |
| Isobutanal              | 23%         | 16%         | 25%         | 11%  | 25%  | 12%  | 10%  | 10%  | 11%  | 8%    | 5%    | 11%   |
| Vinyl acetate           | 87%         | 8%          | 20%         | 31%  | 16%  | 9%   | 5%   | 9%   | 11%  | 10%   | 8%    | 8%    |
| Methacrylonitrile       | 17%         | 4%          | 6%          | 6%   | 13%  | 9%   | 6%   | 9%   | 9%   | 3%    | 3%    | 8%    |
| Chloroform              | 2%          | 10%         | 3%          | 8%   | 6%   | 14%  | 2%   | 4%   | 2%   | 2%    | 4%    | 5%    |
| Butanal                 | 19%         | 3%          | 14%         | 5%   | 15%  | 9%   | 10%  | 9%   | 9%   | 3%    | 7%    | 8%    |
| Tetrahydrofuran         | 12%         | 4%          | 16%         | 7%   | 14%  | 11%  | 9%   | 11%  | 10%  | 4%    | 4%    | 7%    |
| 2-Butanone              | 79%         | 26%         | 40%         | 24%  | 15%  | 15%  | 9%   | 5%   | 11%  | 8%    | 3%    | 7%    |
| Methyl acrylate         | 16%         | 4%          | 8%          | 8%   | 16%  | 9%   | 7%   | 9%   | 9%   | 3%    | 3%    | 8%    |
| Ethyl acetate           | 9%          | 7%          | 9%          | 7%   | 14%  | 10%  | 8%   | 9%   | 9%   | 3%    | 4%    | 7%    |
| 1,2-Dichloroethane      | 16%         | 14%         | 9%          | 4%   | 13%  | 10%  | 6%   | 10%  | 10%  | 3%    | 5%    | 7%    |
| Methyl tert-butyl ether | 7%          | 12%         | 6%          | 8%   | 12%  | 7%   | 8%   | 10%  | 10%  | 3%    | 3%    | 6%    |
| 2-Methylpentane         | 27%         | 10%         | 10%         | 2%   | 7%   | 7%   | 4%   | 6%   | 6%   | 3%    | 2%    | 7%    |
| Benzene                 | 7%          | 28%         | 3%          | 8%   | 24%  | 10%  | 5%   | 8%   | 10%  | 4%    | 3%    | 7%    |
| Tetrachloromethane      | <i>n.d.</i> | 87%         | 29%         | 16%  | 13%  | 7%   | 9%   | 8%   | 9%   | 4%    | 5%    | 6%    |
| Trichloroethene         | 29%         | 6%          | 20%         | 3%   | 6%   | 8%   | 7%   | 11%  | 11%  | 4%    | 5%    | 7%    |
| n-Hexane                | 21%         | 11%         | 3%          | 3%   | 5%   | 4%   | 3%   | 5%   | 0%   | 5%    | 2%    | 2%    |
| 1,4-Dioxan              | 19%         | 11%         | 33%         | 14%  | 16%  | 7%   | 11%  | 13%  | 14%  | 5%    | 7%    | 12%   |
| Isopropyl acetate       | 20%         | 15%         | 13%         | 6%   | 14%  | 10%  | 9%   | 10%  | 10%  | 4%    | 5%    | 6%    |
| Pentanal                | 37%         | 14%         | 19%         | 8%   | 11%  | 10%  | 10%  | 12%  | 11%  | 5%    | 7%    | 7%    |
| n-Heptane               | 24%         | 10%         | 16%         | 5%   | 7%   | 8%   | 6%   | 9%   | 9%   | 4%    | 4%    | 6%    |

*n.d.* not detectable



**Table S5:** Budgets for calculation of combined measurement uncertainty

| Compound                | V <sub>i</sub> (μL) | u <sub>%</sub> (pur) | u <sub>%</sub> (syr <sub>1</sub> ) | u <sub>%</sub> (syr <sub>2</sub> ) | u <sub>%</sub> (V <sub>GCT</sub> )<br>n=4<br>measurements | u <sub>%</sub> (prep) | u(C <sub>GCT</sub> ;%) | u <sub>%</sub> (tube<br>spiking) |
|-------------------------|---------------------|----------------------|------------------------------------|------------------------------------|-----------------------------------------------------------|-----------------------|------------------------|----------------------------------|
| Dichlorodifluoromethane |                     | 2,0%                 |                                    |                                    |                                                           | 14%                   | 14%                    | 1%                               |
| Isobutane               |                     | 2,0%                 |                                    |                                    |                                                           | 3%                    | 4%                     | 1%                               |
| 1,3-Butadiene           |                     | 2,0%                 |                                    |                                    |                                                           | 3%                    | 3%                     | 1%                               |
| Chloroethane            |                     | 2,0%                 |                                    |                                    |                                                           | 12%                   | 12%                    | 1%                               |
| cis/trans-2-Butene*     |                     | 2,0%                 |                                    |                                    |                                                           | 3%                    | 4%                     | 1%                               |
| n-Butane                |                     | 2,0%                 |                                    |                                    |                                                           | 4%                    | 4%                     | 1%                               |
| cis/trans-2-Butene*     |                     | 2,0%                 |                                    |                                    |                                                           | 3%                    | 4%                     | 1%                               |
| Acrolein                |                     | 2,0%                 |                                    |                                    |                                                           | 5%                    | 5%                     | 1%                               |
| Furan                   | 500                 | 1,0%                 | 1%                                 | 1%                                 | 0,03%                                                     | 8%                    | 8%                     | 1%                               |
| Propanal                | 880                 | 3,0%                 | 1%                                 | 1%                                 | 0,03%                                                     | 12%                   | 13%                    | 1%                               |
| Acetone                 | 600                 | 0,5%                 | 1%                                 | 1%                                 | 0,03%                                                     | 8%                    | 8%                     | 1%                               |
| Dichloromethane         | 330                 | 0,2%                 | 1%                                 | 1%                                 | 0,03%                                                     | 4%                    | 5%                     | 1%                               |
| Acrylonitrile           | 720                 | 1,0%                 | 1%                                 | 1%                                 | 0,03%                                                     | 7%                    | 7%                     | 1%                               |
| Carbon disulfide        | 200                 | 0,1%                 | 1%                                 | 1%                                 | 0,03%                                                     | 7%                    | 7%                     | 1%                               |
| Isopropanol             | 360                 | 0,2%                 | 1%                                 | 1%                                 | 0,03%                                                     | 7%                    | 8%                     | 1%                               |
| Trichlorofluoromethane  |                     | 2,0%                 |                                    |                                    |                                                           | 13%                   | 13%                    | 1%                               |
| 1,1-Dichloroethene      | 200                 | 0,3%                 | 1%                                 | 1%                                 | 0,03%                                                     | 7%                    | 7%                     | 1%                               |
| Bromoethane             | 320                 | 1,0%                 | 1%                                 | 1%                                 | 0,03%                                                     | 7%                    | 7%                     | 1%                               |
| Methyl acetate          | 500                 | 1,0%                 | 1%                                 | 1%                                 | 0,03%                                                     | 7%                    | 7%                     | 1%                               |
| 2-Chloropropane         |                     | 2,0%                 |                                    |                                    |                                                           | 12%                   | 12%                    | 1%                               |
| 1-Propanol              | 590                 | 0,5%                 | 1%                                 | 1%                                 | 0,03%                                                     | 9%                    | 9%                     | 1%                               |
| Diethyl ether           | 820                 | 0,1%                 | 1%                                 | 1%                                 | 0,03%                                                     | 9%                    | 9%                     | 1%                               |
| Isopentane              |                     | 2,0%                 |                                    |                                    |                                                           | 4%                    | 5%                     | 1%                               |
| Propanenitrile          | 550                 | 1,2%                 | 1%                                 | 1%                                 | 0,03%                                                     | 10%                   | 10%                    | 1%                               |
| Isoprene                | 600                 | 1,0%                 | 1%                                 | 1%                                 | 0,03%                                                     | 1%                    | 2%                     | 1%                               |
| n-Pentane               |                     | 2,0%                 |                                    |                                    |                                                           | 5%                    | 5%                     | 1%                               |
| tert-Butanol            | 380                 | 1,0%                 | 1%                                 | 1%                                 | 0,03%                                                     | 9%                    | 9%                     | 1%                               |
| Methacrolein            | 540                 | 5,5%                 | 1%                                 | 1%                                 | 0,03%                                                     | 4%                    | 7%                     | 1%                               |
| Cyclopentane            | 400                 | 0,3%                 | 1%                                 | 1%                                 | 0,03%                                                     | 4%                    | 4%                     | 1%                               |
| Isobutanal              | 450                 | 0,5%                 | 1%                                 | 1%                                 | 0,03%                                                     | no data (n=2)         |                        | 1%                               |
| Vinyl acetate           | 650                 | 1,0%                 | 1%                                 | 1%                                 | 0,03%                                                     | 7%                    | 7%                     | 1%                               |
| Methacrylonitrile       | 730                 | 1,0%                 | 1%                                 | 1%                                 | 0,03%                                                     | 7%                    | 8%                     | 1%                               |
| Chloroform              |                     | 2,0%                 |                                    |                                    |                                                           | 12%                   | 13%                    | 1%                               |
| Butanal                 | 540                 | 0,5%                 | 1%                                 | 1%                                 | 0,03%                                                     | 4%                    | 4%                     | 1%                               |
| Tetrahydrofuran         | 520                 | 0,1%                 | 1%                                 | 1%                                 | 0,03%                                                     | 11%                   | 11%                    | 1%                               |
| 2-Butanone              | 500                 | 0,5%                 | 1%                                 | 1%                                 | 0,03%                                                     | 8%                    | 8%                     | 1%                               |
| Methyl acrylate         | 350                 | 0,5%                 | 1%                                 | 1%                                 | 0,03%                                                     | no data (n=2)         |                        | 1%                               |
| Ethyl acetate           | 600                 | 0,2%                 | 1%                                 | 1%                                 | 0,03%                                                     | 7%                    | 7%                     | 1%                               |
| 1,2-Dichloroethane      | 230                 | 0,2%                 | 1%                                 | 1%                                 | 0,03%                                                     | 6%                    | 7%                     | 1%                               |
| Methyl tert-butyl ether | 650                 | 0,2%                 | 1%                                 | 1%                                 | 0,03%                                                     | 8%                    | 8%                     | 1%                               |
| 2-Methylpentane         | 450                 | 0,5%                 | 1%                                 | 1%                                 | 0,03%                                                     | 4%                    | 5%                     | 1%                               |
| Benzene                 | 240                 | 0,2%                 | 1%                                 | 1%                                 | 0,03%                                                     | 8%                    | 8%                     | 1%                               |
| Tetrachloromethane      | 170                 | 1,0%                 | 1%                                 | 1%                                 | 0,03%                                                     | 5%                    | 6%                     | 1%                               |
| Trichloroethene         | 200                 | 0,5%                 | 1%                                 | 1%                                 | 0,03%                                                     | 6%                    | 6%                     | 1%                               |
| n-Hexane                |                     | 2,0%                 |                                    |                                    |                                                           | 6%                    | 6%                     | 1%                               |
| 1,4-Dioxan              | 440                 | 1,0%                 | 1%                                 | 1%                                 | 0,03%                                                     | 9%                    | 10%                    | 1%                               |
| Isopropyl acetate       | 600                 | 2,0%                 | 1%                                 | 1%                                 | 0,03%                                                     | 5%                    | 5%                     | 1%                               |
| Pentanal                | 540                 | 10,0%                | 1%                                 | 1%                                 | 0,03%                                                     | 34%                   | 35%                    | 1%                               |
| n-Heptane               | 460                 | 1,0%                 | 1%                                 | 1%                                 | 0,03%                                                     | 9%                    |                        | 1%                               |

| Compound                | S (Residual STDEV) | B1 (Slope)  | $\bar{m}$ , Mean of Cal amount | $m_{\text{calculated}}$ (here Cal9) | Sxx    | n (number of cal levels) | p (number of repetitions) | u(cal) | u(cal)/ $m_{\text{calculated}}$ |
|-------------------------|--------------------|-------------|--------------------------------|-------------------------------------|--------|--------------------------|---------------------------|--------|---------------------------------|
| Dichlorodifluoromethane | 0,116008175        | 0,00979367  | 65,14                          | 95,50                               | 75572  | 12                       | 3                         | 7,757  | 8%                              |
| Isobutane               | 0,008364559        | 0,014361531 | 52,74                          | 72,56                               | 52832  | 12                       | 3                         | 0,379  | 1%                              |
| 1,3-Butadiene           | 0,007977803        | 0,008311066 | 47,52                          | 65,37                               | 42881  | 12                       | 3                         | 0,625  | 1%                              |
| Chloroethane            | 0,029475878        | 0,007216116 | 35,63                          | 52,24                               | 22612  | 12                       | 3                         | 2,675  | 5%                              |
| cis/trans-2-Butene*     | 0,007027817        | 0,007527364 | 51,73                          | 71,16                               | 50821  | 12                       | 3                         | 0,608  | 1%                              |
| n-Butane                | 0,014787935        | 0,011569935 | 53,70                          | 73,86                               | 54753  | 12                       | 3                         | 0,832  | 1%                              |
| cis/trans-2-Butene*     | 0,005851169        | 0,007594444 | 53,00                          | 72,91                               | 53350  | 12                       | 3                         | 0,502  | 1%                              |
| Acrolein                | 0,002932419        | 0,003749155 | 51,49                          | 70,83                               | 50345  | 12                       | 3                         | 0,509  | 1%                              |
| Furan                   | 0,035226243        | 0,017270146 | 23,09                          | 31,76                               | 10125  | 12                       | 3                         | 1,328  | 4%                              |
| Propanal                | 0,014958069        | 0,004869475 | 45,66                          | 62,81                               | 39592  | 12                       | 3                         | 2,000  | 3%                              |
| Acetone                 | 0,064801742        | 0,018731892 | 31,18                          | 42,89                               | 18463  | 12                       | 3                         | 2,253  | 5%                              |
| Dichloromethane         | 0,037892465        | 0,01300339  | 28,66                          | 39,43                               | 15604  | 12                       | 3                         | 1,898  | 5%                              |
| Acrylonitrile           | 0,015509764        | 0,010070362 | 19,09                          | 26,26                               | 6919   | 12                       | 3                         | 1,003  | 4%                              |
| Carbon disulfide        | 0,09377471         | 0,039746304 | 21,01                          | 28,90                               | 8383   | 12                       | 3                         | 1,536  | 5%                              |
| Isopropanol             | 0,036637926        | 0,01411674  | 23,28                          | 32,02                               | 10289  | 12                       | 3                         | 1,690  | 5%                              |
| Trichlorofluoromethane  | 0,10457121         | 0,027954497 | 79,09                          | 116,03                              | 111647 | 12                       | 3                         | 2,450  | 2%                              |
| 1,1-Dichloroethene      | 0,023978415        | 0,018450833 | 15,99                          | 22,00                               | 4858   | 12                       | 3                         | 0,846  | 4%                              |
| Bromoethane             | 0,027536038        | 0,013261047 | 31,37                          | 43,16                               | 18691  | 12                       | 3                         | 1,352  | 3%                              |
| Methyl acetate          | 0,016220137        | 0,00403688  | 44,77                          | 61,58                               | 38057  | 12                       | 3                         | 2,617  | 4%                              |
| 2-Chloropropane         | 0,0039933          | 0,005891253 | 35,63                          | 52,24                               | 22612  | 12                       | 3                         | 0,444  | 1%                              |
| 1-Propanol              | 0,009664964        | 0,002427184 | 39,20                          | 53,93                               | 29187  | 12                       | 3                         | 2,593  | 5%                              |
| Diethyl ether           | 0,019917761        | 0,007661396 | 28,99                          | 39,87                               | 15955  | 12                       | 3                         | 1,693  | 4%                              |
| Isopentane              | 0,008665849        | 0,006966853 | 65,22                          | 89,71                               | 80768  | 12                       | 3                         | 0,810  | 1%                              |
| Propanenitrile          | 0,012690231        | 0,007700638 | 18,57                          | 25,54                               | 6546   | 12                       | 3                         | 1,073  | 4%                              |
| Isoprene                | 0,034451874        | 0,017054693 | 27,12                          | 37,31                               | 13971  | 12                       | 3                         | 1,316  | 4%                              |
| n-Pentane               | 0,022474425        | 0,010935962 | 64,89                          | 89,26                               | 79960  | 12                       | 3                         | 1,338  | 1%                              |
| tert-Butanol            | 0,043387664        | 0,020767621 | 24,22                          | 33,31                               | 11137  | 12                       | 3                         | 1,361  | 4%                              |
| Methacrolein            | 0,036876632        | 0,010206098 | 28,97                          | 39,86                               | 15943  | 12                       | 3                         | 2,353  | 6%                              |
| Cyclopentane            | 0,010998001        | 0,009577337 | 19,91                          | 27,39                               | 7532   | 12                       | 3                         | 0,748  | 3%                              |
| Isobutanal              | 0,005113159        | 0,00538533  | 23,50                          | 32,33                               | 10491  | 12                       | 3                         | 0,618  | 2%                              |
| Vinyl acetate           | 0,009484134        | 0,003265167 | 39,94                          | 54,94                               | 30290  | 12                       | 3                         | 1,892  | 3%                              |
| Methacrylonitrile       | 0,014786564        | 0,008988127 | 19,25                          | 26,49                               | 7040   | 12                       | 3                         | 1,071  | 4%                              |
| Chloroform              | 0,06977327         | 0,021087871 | 68,24                          | 100,04                              | 82923  | 12                       | 3                         | 2,167  | 2%                              |
| Butanal                 | 0,014615833        | 0,004260238 | 28,62                          | 39,37                               | 15558  | 12                       | 3                         | 2,234  | 6%                              |
| Tetrahydrofuran         | 0,015959058        | 0,007324137 | 23,04                          | 31,69                               | 10078  | 12                       | 3                         | 1,419  | 4%                              |
| 2-Butanone              | 0,005645031        | 0,002045052 | 26,61                          | 36,61                               | 13449  | 12                       | 3                         | 1,798  | 5%                              |
| Methyl acrylate         | 0,02810439         | 0,013917835 | 22,21                          | 30,55                               | 9369   | 12                       | 3                         | 1,315  | 4%                              |
| Ethyl acetate           | 0,011363086        | 0,003331686 | 35,89                          | 49,37                               | 24462  | 12                       | 3                         | 2,221  | 4%                              |
| 1,2-Dichloroethane      | 0,028372918        | 0,015598726 | 18,74                          | 25,78                               | 6670   | 12                       | 3                         | 1,185  | 5%                              |
| Methyl tert-butyl ether | 0,067974444        | 0,035394662 | 23,92                          | 32,91                               | 10869  | 12                       | 3                         | 1,251  | 4%                              |
| 2-Methylpentane         | 0,021047128        | 0,015914998 | 19,43                          | 26,73                               | 7168   | 12                       | 3                         | 0,861  | 3%                              |
| Benzene                 | 0,088905399        | 0,043856268 | 17,51                          | 24,08                               | 5821   | 12                       | 3                         | 1,320  | 5%                              |
| Tetrachloromethane      | 0,029691133        | 0,02190195  | 18,35                          | 25,24                               | 6395   | 12                       | 3                         | 0,883  | 3%                              |
| Trichloroethene         | 0,038813248        | 0,01930508  | 19,43                          | 26,72                               | 7166   | 12                       | 3                         | 1,309  | 5%                              |
| n-Hexane                | 0,026246202        | 0,011336898 | 76,88                          | 105,75                              | 112236 | 12                       | 3                         | 1,508  | 1%                              |
| 1,4-Dioxan              | 0,03101253         | 0,01045817  | 22,45                          | 30,88                               | 9569   | 12                       | 3                         | 1,931  | 6%                              |
| Isopropyl acetate       | 0,019068306        | 0,005892491 | 34,07                          | 46,87                               | 22044  | 12                       | 3                         | 2,107  | 4%                              |
| Pentanal                | 0,024070013        | 0,008389305 | 27,09                          | 37,27                               | 13941  | 12                       | 3                         | 1,868  | 5%                              |
| n-Heptane               | 0,021047931        | 0,009931827 | 18,29                          | 24,88                               | 6139   | 12                       | 3                         | 1,380  | 6%                              |

| Compound          | u(rep) | u(repr) | u(prec) | u(Prec)/m <sub>calculated</sub> | k | U <sub>m</sub> _Calculated (%) |
|-------------------|--------|---------|---------|---------------------------------|---|--------------------------------|
| Dichlorodifluoror | 40,34  | 3,60    | 40,50   | 42%                             | 2 | 91%                            |
| Isobutane         | 8,90   | 0,58    | 8,92    | 12%                             | 2 | 26%                            |
| 1,3-Butadiene     | 8,07   | 0,53    | 8,08    | 12%                             | 2 | 26%                            |
| Chloroethane      | 5,75   | 0,64    | 5,79    | 11%                             | 2 | 35%                            |
| cis/trans-2-Buter | 8,56   | 0,57    | 8,58    | 12%                             | 2 | 25%                            |
| n-Butane          | 9,65   | 0,59    | 9,67    | 13%                             | 2 | 28%                            |
| cis/trans-2-Buter | 8,63   | 0,58    | 8,65    | 12%                             | 2 | 25%                            |
| Acrolein          | 6,14   | 0,43    | 6,15    | 9%                              | 2 | 20%                            |
| Furan             | 2,32   | 0,24    | 2,34    | 7%                              | 2 | 23%                            |
| Propanal          | 4,13   | 0,36    | 4,14    | 7%                              | 2 | 30%                            |
| Acetone           | 2,63   | 0,25    | 2,64    | 6%                              | 2 | 23%                            |
| Dichloromethane   | 2,55   | 0,27    | 2,56    | 7%                              | 2 | 19%                            |
| Acrylonitrile     | 1,66   | 0,17    | 1,67    | 6%                              | 2 | 21%                            |
| Carbon disulfide  | 2,36   | 0,22    | 2,37    | 8%                              | 2 | 24%                            |
| Isopropanol       | 2,61   | 0,16    | 2,62    | 8%                              | 2 | 25%                            |
| Trichlorofluorom  | 9,32   | 0,94    | 9,37    | 8%                              | 2 | 31%                            |
| 1,1-Dichloroether | 1,69   | 0,16    | 1,69    | 8%                              | 2 | 23%                            |
| Bromoethane       | 2,92   | 0,31    | 2,94    | 7%                              | 2 | 21%                            |
| Methyl acetate    | 3,58   | 0,34    | 3,59    | 6%                              | 2 | 21%                            |
| 2-Chloropropane   | 5,13   | 0,38    | 5,15    | 10%                             | 2 | 31%                            |
| 1-Propanol        | 4,51   | 0,47    | 4,54    | 8%                              | 2 | 27%                            |
| Diethyl ether     | 2,72   | 0,26    | 2,73    | 7%                              | 2 | 24%                            |
| Isopentane        | 9,72   | 0,69    | 9,75    | 11%                             | 2 | 24%                            |
| Propanenitrile    | 1,49   | 0,14    | 1,50    | 6%                              | 2 | 25%                            |
| Isoprene          | 2,92   | 0,28    | 2,93    | 8%                              | 2 | 18%                            |
| n-Pentane         | 10,50  | 0,69    | 10,52   | 12%                             | 2 | 26%                            |
| tert-Butanol      | 2,61   | 0,16    | 2,61    | 8%                              | 2 | 25%                            |
| Methacrolein      | 2,15   | 0,26    | 2,17    | 5%                              | 2 | 21%                            |
| Cyclopentane      | 2,05   | 0,20    | 2,06    | 8%                              | 2 | 18%                            |
| Isobutanal        | 2,62   | 0,22    | 2,62    | 8%                              | 2 | 17%                            |
| Vinyl acetate     | 8,08   | 0,48    | 8,09    | 15%                             | 2 | 33%                            |
| Methacrylonitrile | 1,47   | 0,16    | 1,47    | 6%                              | 2 | 21%                            |
| Chloroform        | 8,04   | 0,56    | 8,06    | 8%                              | 2 | 30%                            |
| Butanal           | 2,73   | 0,24    | 2,74    | 7%                              | 2 | 20%                            |
| Tetrahydrofuran   | 1,67   | 0,18    | 1,68    | 5%                              | 2 | 26%                            |
| 2-Butanone        | 2,04   | 0,21    | 2,05    | 6%                              | 2 | 23%                            |
| Methyl acrylate   | 1,72   | 0,18    | 1,73    | 6%                              | 2 | 14%                            |
| Ethyl acetate     | 2,55   | 0,30    | 2,57    | 5%                              | 2 | 20%                            |
| 1,2-Dichloroetha  | 1,38   | 0,16    | 1,39    | 5%                              | 2 | 20%                            |
| Methyl tert-butyl | 1,80   | 0,15    | 1,80    | 5%                              | 2 | 21%                            |
| 2-Methylpentane   | 2,21   | 0,17    | 2,21    | 8%                              | 2 | 20%                            |
| Benzene           | 1,13   | 0,20    | 1,15    | 5%                              | 2 | 22%                            |
| Tetrachlorometh   | 1,26   | 0,15    | 1,27    | 5%                              | 2 | 17%                            |
| Trichloroethene   | 1,18   | 0,16    | 1,19    | 4%                              | 2 | 18%                            |
| n-Hexane          | 9,40   | 0,67    | 9,42    | 9%                              | 2 | 22%                            |
| 1,4-Dioxan        | 1,81   | 0,28    | 1,83    | 6%                              | 2 | 26%                            |
| Isopropyl acetate | 2,25   | 0,28    | 2,27    | 5%                              | 2 | 17%                            |
| Pentanal          | 2,11   | 0,22    | 2,12    | 6%                              | 2 | 73%                            |
| n-Heptane         | 1,15   | 0,15    | 1,16    | 5%                              | 2 | 15%                            |
